# Supplementary material for: Biogenic SnO2/CPA nanocomposite a green heterogeneous catalyst for biodiesel production from waste cooking oil: Synthesis, Characterization and Transesterification studies
Source: Research Square preprint supplement (doi:10.21203/rs.3.rs-3876142/v1), 2024-01-22
Supplement: Supplementary file 1 [file a982cdfbf2c42545a11f94f2.docx]

**Graphical Abstract**


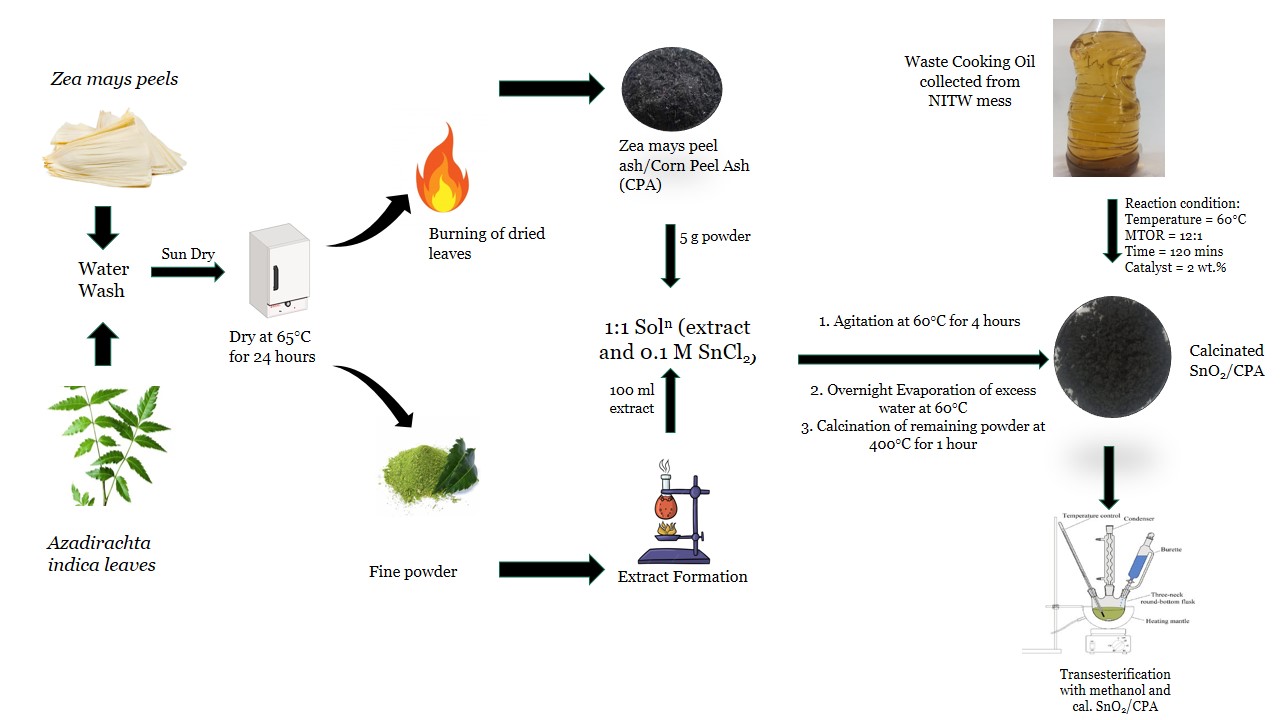


**Highlights**

- Biogenic synthesis of SnO2/CPA nanocompositeusing leaf extract of *Azadirachta indica.*
- The biomolecules present in the leaf extract act as a complexing as well as a capping agent.
- SnO2/CPA nanocomposite was employed as heterogeneous catalyst for conversion of waste cooking to biodiesel.
- The novel catalyst is environmental friendly with high surface area and good catalytic activity.

Fig. S1 of Supplementary Information


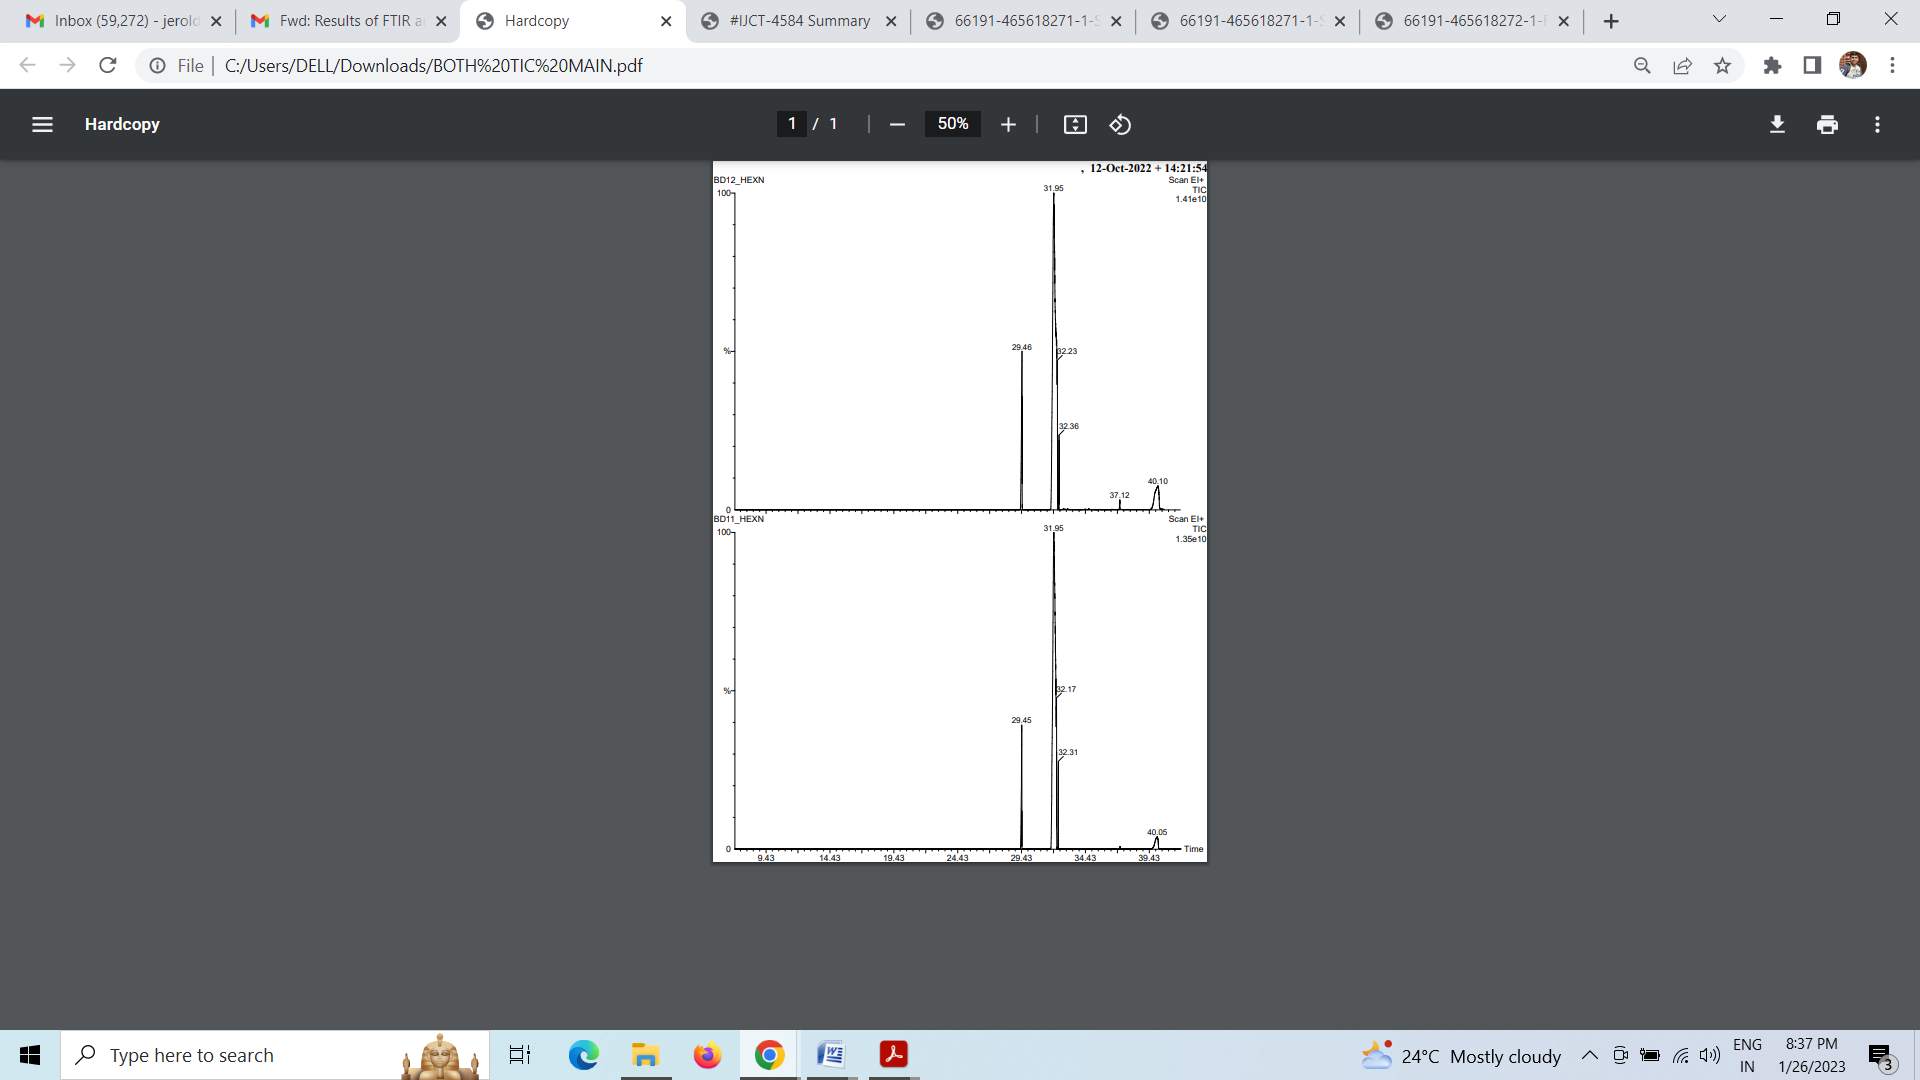


Fig. S1 **Gas chromatographic analysis of biodiesel showing fatty acids methyl ester (FAME) content**


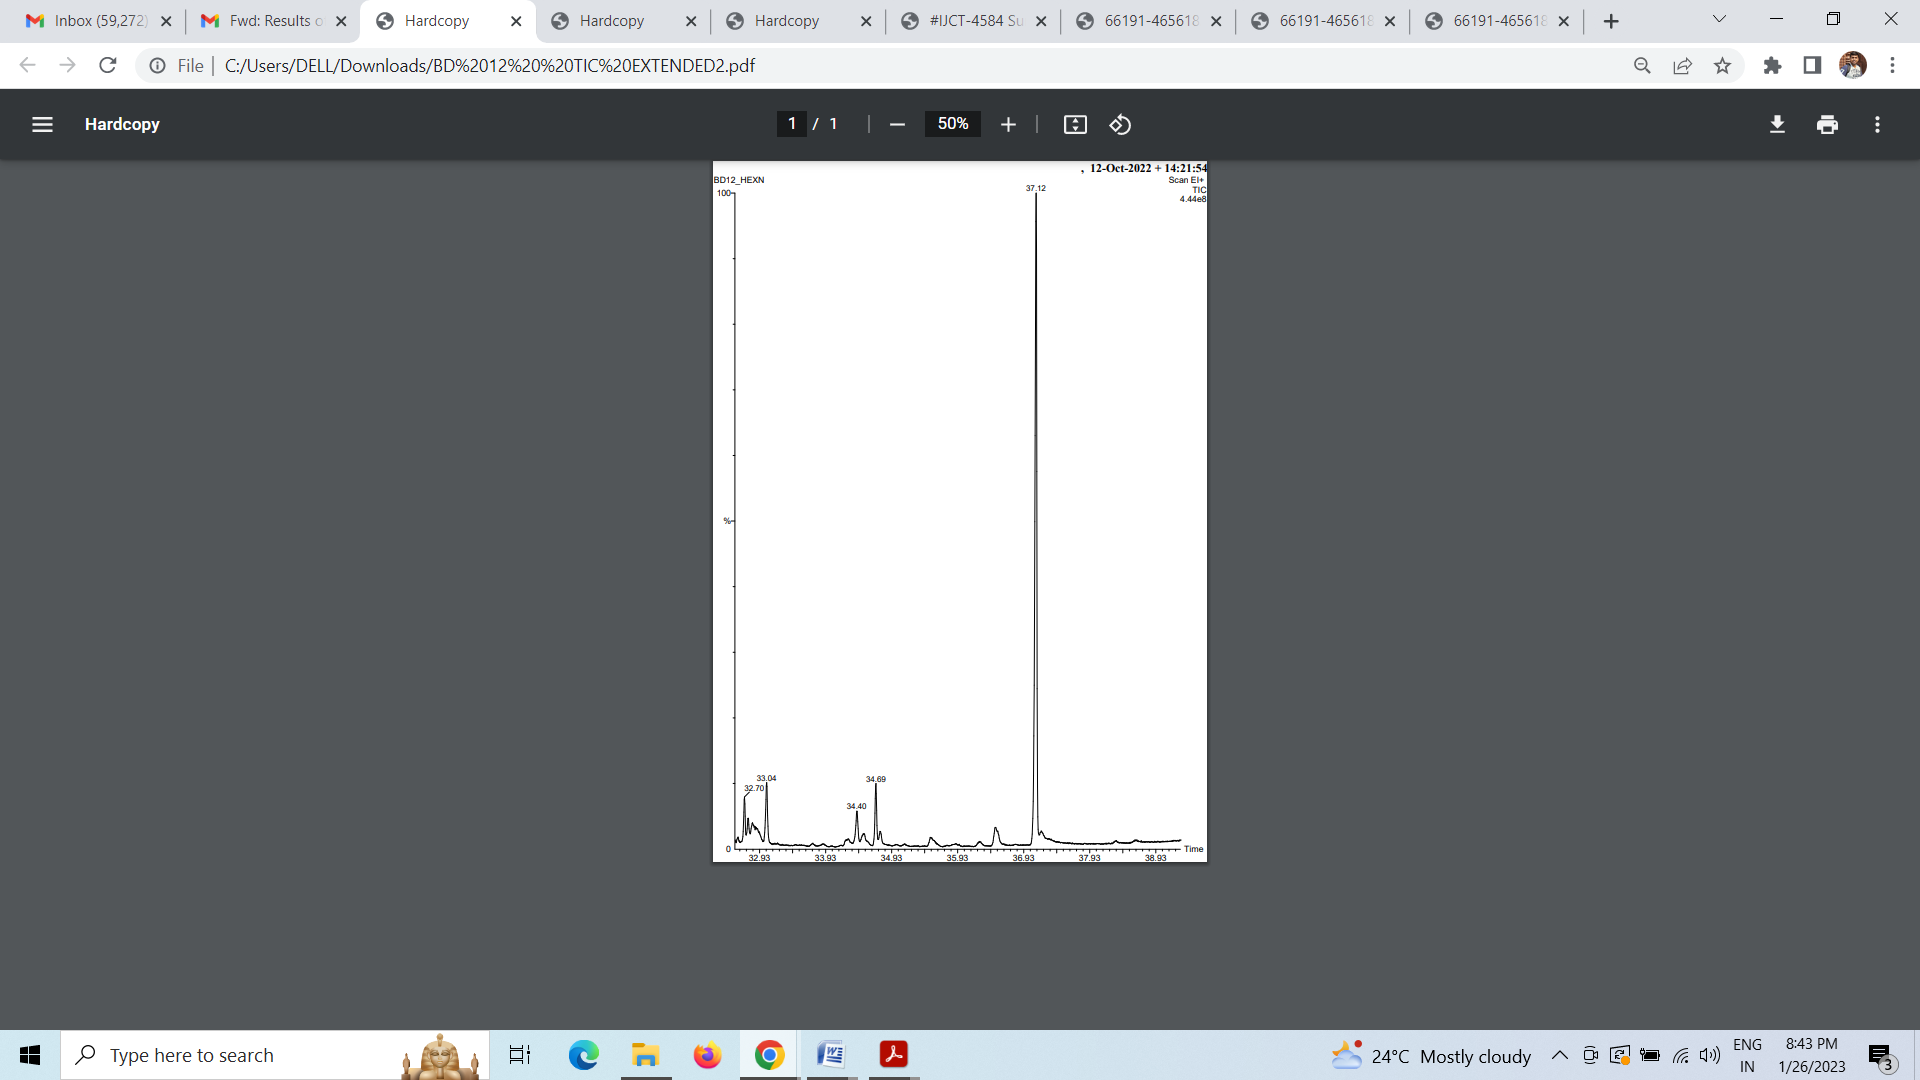


Fig. S1 **Gas chromatographic analysis of biodiesel showing fatty acids methyl ester (FAME) content**
